# Supplementary material for: Multimodal intervention in 8- to 13-year-old French dyslexic readers: Study protocol for a randomized multicenter controlled crossover trial
Source: PubMed Central journal article supplement (PMC9795620; doi:10.1186/s12887-022-03701-8), 2022-12-28
Supplement: 12887_2022_3701_MOESM4_ESM.pdf [file 12887_2022_3701_MOESM4_ESM.pdf]

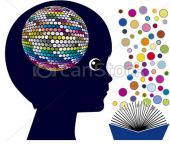

## Parent sheet, visuo-attentional training

DDMR Study, 19-HPNCL-02

- Regularly remind your child why he or she needs to do the exercises.
  - The speech therapist will tell you which exercises are appropriate for your child's age and difficulties. All you have to do is follow this progression.
- Remember that regular practice guarantees effectiveness. So don't replace 2 days (15 min each) with 1 day (30 minutes).*

### 1. Maeva /Lexical Access: 15 min/day

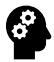

**What for? When we see more letters at the same time, we analyze them better and therefore read faster and write better.**

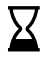

**When? For one month, 5 days/week for 15 minutes/day:**

- 10 minutes of training with Maeva.
- 5 minutes of spelling memory training (Lexical Access in PowerPoint).

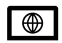

Spelling memory training is done with an adult:

- The child reads the words: if the child makes a mistake, the parent should read the word correctly aloud.
- Explain the meaning of unknown words.
- The child writes the words while the slides scroll at normal speed.
- Tell the child to write at his own pace, even if he or she can't write all the words.
- At the end, go back to each slide and check that the word is written and that it is correct.
- If there is an error, the child writes the word after looking only once at the screen: the child looks at the word and writes it completely without looking at the screen again.

**NB: Repeat the same list of words for 3 consecutive days and then change list when there are no more errors (words and progression have to be adapted to the child's difficulties).**

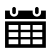

Follow-up calendar:

- Mark with an X when the training is done and successfully completed.
- Otherwise put the number of words correctly written in the box.
- Put 0 if the training has not been done.

|        | Day 1 | Day 2 | Day 3 | Day 4 | Day 5 |
|--------|-------|-------|-------|-------|-------|
| Week 1 |       |       |       |       |       |
| Week 2 |       |       |       |       |       |
| Week 3 |       |       |       |       |       |
| Week 4 |       |       |       |       |       |

## 2. Switchipido /Lexical Access: 15 min per day

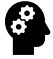

**What for? When we pay more attention to words and letters, we see them faster and therefore read faster and write better**

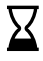

**When? For one month, 5 days a week for 15 minutes:**

- 10 minutes of training with Switchipido.
- 5 minutes of spelling memory in the same way as the first month

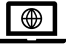

| Type d'exercice                                                                                                                                                                                                       | Configuration                                                                                                                                                                                                                                             |
|-----------------------------------------------------------------------------------------------------------------------------------------------------------------------------------------------------------------------|-----------------------------------------------------------------------------------------------------------------------------------------------------------------------------------------------------------------------------------------------------------|
| <input type="radio"/> Panneau Global<br><input checked="" type="radio"/> Triplet Global<br><input type="radio"/> Panneau Alternance<br><input type="radio"/> Triplet Simple<br><input type="radio"/> Triplet complexe | Durée de l'exercice <input type="text" value="10"/> min<br>Nombre de blocs <input type="text" value="5"/><br>Nombre d'items par bloc 20<br>Temps entre les blocs 0.75 min<br>Intervalle entre les items 1 sec<br><input type="checkbox"/> stop sur erreur |
| <input type="button" value="Créer"/> <input type="button" value="Retour"/>                                                                                                                                            |                                                                                                                                                                                                                                                           |

Duration of exercise: 10 min  
Number of blocks: maximum

Example of progression:  
Week 1: Global Panel and Triplet Global  
Week 2: Alternate Panel  
Week 3: Simple Triplet  
Week 4: Triplet Complex

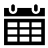

Follow-up calendar:

- Check with an X when the training is done and successfully completed.
- Otherwise enter the number of words correctly written in the box.
- Write 0 if the training has not been done.

|        | Day 1 | Day 2 | Day 3 | Day 4 | Day 5 |
|--------|-------|-------|-------|-------|-------|
| Week 1 |       |       |       |       |       |
| Week 2 |       |       |       |       |       |
| Week 3 |       |       |       |       |       |
| Week 4 |       |       |       |       |       |

At the end of the training (2 months), bring the completed card back to your speech therapist.

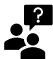

Remarks:

- Did you child willingly complete the exercises: yes, no?
- What exercises did he or she like?
- What exercises did he or she dislike?
- What problems did you encounter and with what software?
- Other remarks:

First name:

Last name:

Date:
