# Supplementary material for: Multimodal intervention in 8- to 13-year-old French dyslexic readers: Study protocol for a randomized multicenter controlled crossover trial
Source: PubMed Central journal article supplement (PMC9795620; doi:10.1186/s12887-022-03701-8), 2022-12-28
Supplement: 12887_2022_3701_MOESM6_ESM.pdf [file 12887_2022_3701_MOESM6_ESM.pdf]

## **Case Report Form (CRF)**

### **Phase 1- Test 1**

#### **Selection and Inclusion**

**Developmental dyslexia and method of remediation (DDMR)  
Multimodal intervention in French-speaking children aged 8 to 13 years:  
study protocol for a randomized multicentre controlled cross-over trial**

**DDMR**

**Internal Code: ID No. RCB 2019-A01453-54 – No. 19-HPNCL-02**

**Case Report Form (CRF)**

**Phase 1 - Test 1: Selection and Inclusion**

**Center no.:** |\_|\_|

**Patient no. (or patient code):** |\_|\_|

**Patient initials:** |\_| - |\_|  
(1<sup>st</sup> letter of last name – 1<sup>st</sup> letter of first name)

**Sponsor:**

**Fondation LENVAL Hôpitaux Pédiatriques de Nice**

CHU-Lenval

57, Avenue de la Californie - 06200 Nice

☎ : 04 92 03 03 92    ☎ : 04 92 03 03 44

@ : [fondation@lenval.com](mailto:fondation@lenval.com)

**Coordinating Investigator:**

**Karine Harrar Eskinazi**

CERTA- Nice-CHU-Lenval

54 avenue de La Californie, 06200 Nice

☎ : 04 92 03 92 00    ☎ : 04 92 03 00 00

@ : [karine.eskinazi@univ-cotedazur.fr](mailto:karine.eskinazi@univ-cotedazur.fr)

**Thesis director:**

**Pr Sylvane FAURE**

Laboratoire LAPCOS, UCA – MSHS - SE

24, avenue des Diabls Bleus, 06357 NICE Cedex

☎ : +33 4 89 15 23 72

@ : [sylvane.faure@univ-cotedazur.fr](mailto:sylvane.faure@univ-cotedazur.fr)

**Thesis co-director:**

**Dr Bruno De Cara, MCF**

Laboratoire LAPCOS, UCA – MSHS - SE

24, avenue des Diabls Bleus, 06357 NICE Cedex

☎ : +33 4 89 15 23 72

@ : [bruno.de-cara@univ-cotedazur.fr](mailto:bruno.de-cara@univ-cotedazur.fr)

|                      |                       |                                                     |
|----------------------|-----------------------|-----------------------------------------------------|
| <b>Internal code</b> | <b>Patient number</b> | <b>PHASE 1 - Selection and inclusion<br/>TEST 1</b> |
| 19-HPNCL-02          | □□□/□□□/□□□□□         |                                                     |

## INSTRUCTIONS TO COMPLETE THE CASE REPORT FORM

### **1-GENERALITIES:**

- Write in the designated space.
- Write in capitals.
- Use a black ballpoint pen.
- Do not use abbreviations.
- Complete the header on each page.

### **2-BOXES:**

Open boxes (|\_|\_|\_|\_|): enter only one character per box.

Closed boxes: check the corresponding answer

- **Numeric values:**

- Align the numerical values to the right

- Do not leave boxes empty, enter zero. E.g.: Incorrect: |\_2\_|\_1\_|\_|\_|

Correct: |\_0\_|\_2\_|\_1\_|

- **Dates:** write dates in the day/month/year format (dd/mm/yyyy).

### **3-ERRORS:**

In the event of an error, cross out the erroneous information with a single line so that it remains visible. Note the correction next to it, report, and date. Do not use correction fluid.

### **4-END OF STUDY:**

When the patient's participation ends, whether at the end of the study or prematurely, complete the end-of-study sheet.

- **The end-of-study date:**

It is the date of the last information collected as part of the study. No review related to the study, administration of the treatment under study, or data collection will be carried out after that date. The end-of-study date may be the date of the last visit or the date of the last information collected as part of the visit.

- **Early exit:**

If the patient leaves the study before the end of the study, please specify the reason for this premature exit. If in doubt do not hesitate to contact the sponsor CRA (Clinical Research Associate) or the coordinating investigator. Premature exit by the patient: the patient may decide at any time to interrupt his or her participation in the study (refusal to continue / withdrawal of consent). All the data collected until the exit will be collected and analyzed (Jardé Law – Article L.1121-1-1du CSP, 18<sup>th</sup> November 2016 version).

### **5-CONTACT:**

If any problems arise when filling out the CRF, please contact the sponsor (contact details mentioned on page 1).

### **6-Specific conventions for filling out the CRF:**

- The data is collected in the tables included in this CRF in raw scores, Z scores and percentiles according to the instructions provided in the manuals for each test.
- For children with “high intellectual potential” the reading age must be compared with the age of development and not with the actual age.
- For Alouette©, two calibrations are used: the first calibration for the reading age and the second calibration dating from 2005.
- For DeltaText and Likert scales, there are no Z scores.
- Training is adapted to the cognitive profile of each child. For example, the child that does not have a visuo-attentional span disorder will complete 2 months of training with Switchipido© and will not practice with Maeva©. Therefore, the pre- and post-training baseline tables for Maeva© will not be used.

|                      |                       |                                                     |
|----------------------|-----------------------|-----------------------------------------------------|
| <b>Internal code</b> | <b>Patient number</b> | <b>PHASE 1 - Selection and inclusion<br/>TEST 1</b> |
| 19-HPNCL-02          | □□/□□/□□□□            |                                                     |

**Experimental procedure**

| PHASES                                      |                                           | Visits                        | Details and duration of the assement or intervention                                     |                        |
|---------------------------------------------|-------------------------------------------|-------------------------------|------------------------------------------------------------------------------------------|------------------------|
| <b>P<br/>h<br/>a<br/>s<br/>e<br/><br/>1</b> | <b>TEST 1</b>                             | V 1 to V4                     | Information, consent, selection<br><b>Baseline assessment</b>                            | 4 hr                   |
|                                             | <b>No intensive training<br/>2 months</b> | V 5 to V 12                   | Speech therapy sessions (STS): 30 min/week                                               | STS: 4 hr              |
|                                             | <b>TEST 2</b>                             | V 13- V 14                    | <b>Post-control assessment</b>                                                           | 2 hr                   |
| <b>P<br/>h<br/>a<br/>s<br/>e<br/><br/>2</b> | <b>INTENSIVE TRAINING 1<br/>2 months</b>  | V 15                          | Pre-training 1A baseline assessment                                                      | 30 min                 |
|                                             |                                           | V 16 to V 19                  | Home training (HT): 5 days/week-15 min/day<br>Speech therapy sessions (STS): 30 min/week | HT: 5 hr<br>STS: 2 hr  |
|                                             |                                           | V 20                          | Post-training 1A baseline assessment                                                     | 15 min                 |
|                                             |                                           | V 21                          | Pre-training 1B baseline assessment                                                      | 30 min                 |
|                                             |                                           | V 22 to V 25                  | Home training (HT): 5 days/week-15 min/day<br>Speech therapy sessions (STS): 30 min/week | HT: 5 hr<br>STS: 2 hr  |
|                                             |                                           | V 26                          | Post-training 1B baseline assessment                                                     | 10 min                 |
|                                             | <b>TEST 3</b>                             | V 27, V 28                    | <b>Post-training assessment 1</b>                                                        | 50 min                 |
| <b>Break</b>                                | V 27, V 28                                | 15 days without home training | 1 hr                                                                                     |                        |
| <b>P<br/>h<br/>a<br/>s<br/>e<br/><br/>2</b> | <b>INTENSIVE TRAINING 2<br/>2 months</b>  | V 29                          | Pre-training 2A baseline assessment                                                      | 30 min                 |
|                                             |                                           | V 30 to V 33                  | Home training (HT): 5 days/week-15 min/day<br>Speech therapy sessions (STS): 30 min/week | HT: 5 hr<br>STS: 2 hr  |
|                                             |                                           | V 34                          | Post-training 2A baseline assessment                                                     | 15 min                 |
|                                             |                                           | V 35                          | Pre-training 2B baseline assessment                                                      | 30 min                 |
|                                             |                                           | V 36 to V 39                  | Home training (HT): 5 days/week-15 min/day<br>Speech therapy sessions (STS): 30 min/week | HT: 5 hr<br>STS: 2 hr  |
|                                             |                                           | V 40                          | Post-training 2B baseline assessment                                                     | 10 min                 |
|                                             | <b>TEST 4</b>                             | V 40                          | <b>Post-training assessment 2</b>                                                        | 50 min                 |
| <b>Break</b>                                | V 41, V 42                                | 15 days without home training | 1 hr                                                                                     |                        |
| <b>P<br/>h<br/>a<br/>s<br/>e<br/><br/>2</b> | <b>INTENSIVE TRAINING 3<br/>2 months</b>  | V 43                          | Pre-training 3 baseline assessment                                                       | 30 min                 |
|                                             |                                           | V 44 to V 51                  | Home training (HT): 5 days/week-15 min/day<br>Speech therapy sessions (STS): 30 min/week | HT: 10 hr<br>STS: 4 hr |
|                                             | <b>TEST 5</b>                             | V 52                          | Post-training 3 baseline assessment                                                      | 10 min                 |
| <b>P<br/>h<br/>a<br/>s<br/>e<br/><br/>3</b> | <b>No intensive training<br/>2 months</b> | V 53-54                       | <b>Post-training assessment 3</b>                                                        | 2 hr                   |
|                                             | <b>TEST 6</b>                             | V 56 to V 64                  | Stop home training<br>Speech therapy sessions (STS): 30 min/week                         | STS: 4 hr              |
| <b>3</b>                                    | <b>TEST 6</b>                             | V 65                          | <b>Follow-up assessment</b>                                                              | 15 min                 |
| <b>Total</b>                                |                                           | 65 weeks                      | 16 months                                                                                | 49 hr 20 min           |

|                      |                       |                                                     |
|----------------------|-----------------------|-----------------------------------------------------|
| <b>Internal code</b> | <b>Patient number</b> | <b>PHASE 1 - Selection and inclusion<br/>TEST 1</b> |
| 19-HPNCL-02          | □□/□□/□□□□            |                                                     |

**SELECTION VISIT- PHASE 1-Test 1-V 1**

V1: first visit: 1 hour

**Date :** □□/□□/□□□□ (DD/MM/YYYY)

**CONSENT COLLECTION**

Mother and  Father

on □□/□□/□□□□ on □□/□□/□□□□  
*DD/MM/YYYY* *DD/MM/YYYY*

Or

The holder of parental authority on □□/□□/□□□□ (DD/MM/YYYY)

Note in the patient's source file the patient's participation in the study and the patient's consent.

In the absence of one of the parents, a prior oral agreement of the absent parent must be obtained and notified in the patient's medical file.

Contact information and written consent of the absent parent should be collected as soon as possible.

If one of the parents has not signed the consent form, the investigator must provide evidence in the child's source file of having tried to contact the parent.

Investigator's name: \_\_\_\_\_

Signature:

**DEMOGRAPHICS**

Born on: □□/□□/□□□□ (DD/MM/YYYY) Age: □□ years □□ months

Sex:  Male  Female Grade: □□□□

**HISTORY**

- Reason for speech therapy: Reading difficulties  Spelling difficulties
- School difficulties
- Other.....

- Illnesses:  Yes  No If yes which ones? (allergies, frequent ear infections, cranial trauma, seizures, neurological or genetic disorders, other)
- .....
- .....



| Internal code | Patient number | PHASE 1 - Selection and inclusion<br>TEST 1 |
|---------------|----------------|---------------------------------------------|
| 19-HPNCL-02   | □□□/□□□/□□□□□  |                                             |

Pathological birth  Yes  No

If so, why? (term, caesarean section, forceps, apgar, intensive care, other)

.....

Disorders during childhood  Yes  No

If so, which ones (sleep disturbance, eating, cleanliness, incessant crying, other)

.....

- Sitting age:
- Walking age:
- Age of first words:
- Age of first sentences:

Impaired global motor skills  Yes  No

If so, which ones (running, jumping, cycling, other)

.....

Impaired fine motor skills  Yes  No

If so, which ones (tie laces, fasten buttons, cut, embed, use cutlery, write, other)

.....

Impaired building skills  Yes  No

If so, which ones (puzzles, LEGO©, models, other)

.....

Language skill disorders  Yes  No

If so, which ones (vocabulary, sentences, narrative, other)

.....

Oral comprehension disorder  Yes  No

If so, in what context (simple language, elaborate language, school, home, multiple instructions)

.....

Impaired attentional abilities  Yes  No

If so, in what context (sustained activity, film, game, school, homework, other)

.....

### SCHOOL SITUATION

---

- In kindergarten, difficulties in carrying out activities  Yes  No
- Difficulties in learning to read  Yes  No
- Difficulties in learning to spell  Yes  No
- Difficulties in learning to write  Yes  No
- Difficulties in learning mathematics  Yes  No
- Current persistence of reading difficulties  Yes  No
- Difficulties in understanding written instructions  Yes  No
- Current persistence of spelling difficulties  Yes  No
- Current persistence of difficulties in mathematics  Yes  No

|                      |                       |                                                     |
|----------------------|-----------------------|-----------------------------------------------------|
| <b>Internal code</b> | <b>Patient number</b> | <b>PHASE 1 - Selection and inclusion<br/>TEST 1</b> |
| 19-HPNCL-02          | □□□/□□□/□□□□□         |                                                     |

- Recommendation to repeat the school year Yes  No
- Repeated school year, which one ..... Yes  No
- Gifted student, in which areas..... Yes  No
- Remedial assistance Yes  No
- Help with homework Yes  No
- Time devoted to homework in the evening

.....

- Additional comments

.....

.....

**SELECTION TESTS, READING AND SPELLING**

*For the administration of the tests, refer to the instruction manual*

- Reading meaningless text (Alouette©)
- Spelling (Chronosdictées©, version A)

**SELECTION CRITERIA**

| <b>SELECTION CRITERIA</b>                                                               | <b>Yes</b>               | <b>No</b>                |
|-----------------------------------------------------------------------------------------|--------------------------|--------------------------|
| Age ≥ 8 and ≤ 13                                                                        | <input type="checkbox"/> | <input type="checkbox"/> |
| Diagnosis of dyslexia or difficulty in reading and/or spelling                          | <input type="checkbox"/> | <input type="checkbox"/> |
| Absence of perceptual, neurological or behavioral disorders                             | <input type="checkbox"/> | <input type="checkbox"/> |
| No oral language problems                                                               | <input type="checkbox"/> | <input type="checkbox"/> |
| Native language: French or early school in French                                       | <input type="checkbox"/> | <input type="checkbox"/> |
| No attentional problems                                                                 | <input type="checkbox"/> | <input type="checkbox"/> |
| No rehabilitation is underway                                                           | <input type="checkbox"/> | <input type="checkbox"/> |
| Home equipped with a computer connected to internet for daily training                  | <input type="checkbox"/> | <input type="checkbox"/> |
| Informed consent signed by both parents or the representative of the parental authority | <input type="checkbox"/> | <input type="checkbox"/> |
| Social Security affiliation or beneficiary                                              | <input type="checkbox"/> | <input type="checkbox"/> |

*If one or more "NO" boxes are checked the patient is not selected for the study*



|                      |                       |                                                     |
|----------------------|-----------------------|-----------------------------------------------------|
| <b>Internal code</b> | <b>Patient number</b> | <b>PHASE 1 - Selection and inclusion<br/>TEST 1</b> |
| 19-HPNCL-02          | □□/□□/□□□□            |                                                     |

**DATA COLLECTION-V 1**

|                                | Tests                                       |                              | Data                        | Raw scores                  | Rate +<br>or - | Z scores (SD or<br>percentiles) | Time<br>(min) |
|--------------------------------|---------------------------------------------|------------------------------|-----------------------------|-----------------------------|----------------|---------------------------------|---------------|
|                                | <b>P<br/>H<br/>A<br/>S<br/>E<br/><br/>1</b> | Anamnesia                    | Survey (CRF p.5 to 7)       | "Don't enter anything here" |                |                                 |               |
| Reading<br>meaningless<br>text |                                             | Alouette©                    | Number of errors            | _ _                         |                | _ _ . _ _                       | 3             |
|                                |                                             |                              | Number of words read        | _ _ _                       |                | _ _ . _ _                       |               |
|                                |                                             |                              | Number of correct words     | _ _ _                       |                | _ _ . _ _                       |               |
|                                |                                             |                              | Time in seconds             | _ _ _                       |                | _ _ . _ _                       |               |
|                                |                                             |                              | Accuracy index              | _ _ _                       |                | _ _ . _ _                       |               |
|                                |                                             |                              | Speed index                 | _ _ _                       |                | _ _ . _ _                       |               |
|                                |                                             |                              | Reading age                 | _ _  years  _ _  months     |                |                                 |               |
| Spelling test                  |                                             | Chronosdictées©<br>Version A | Number of phonetic errors   | _ _                         |                | _ _ . _ _                       | 10            |
|                                |                                             |                              | Number of lexical errors    | _ _                         |                | _ _ . _ _                       |               |
|                                | Number of grammatical errors                |                              | _ _                         |                             | _ _ . _ _      |                                 |               |
|                                | Number of omissions                         |                              | _ _                         |                             | _ _ . _ _      |                                 |               |
|                                | Number of segmentation errors               |                              | _ _                         |                             | _ _ . _ _      |                                 |               |
|                                | Total number of errors                      |                              | _ _                         |                             | _ _ . _ _      |                                 |               |
| <b>V<br/>1</b>                 | Selection                                   | Table CRF p. 8               | "Don't enter anything here" |                             |                |                                 | 5             |
|                                | Information                                 | CRF                          | "Don't enter anything here" |                             |                |                                 | 20            |
|                                | Consent                                     | CRF                          | "Don't enter anything here" |                             |                |                                 | 5             |
|                                | Total time (min)                            |                              |                             |                             |                |                                 | 58            |

|                      |                       |                                                     |
|----------------------|-----------------------|-----------------------------------------------------|
| <b>Internal code</b> | <b>Patient number</b> | <b>PHASE 1 - Selection and inclusion<br/>TEST 1</b> |
| 19-HPNCL-02          | □□/□□/□□□□            |                                                     |

**INCLUSION VISIT - PHASE 1- TEST 1- V 2 to V 4**

*To administer and determine the order of tests, refer to the manual sent to you that specifies the order to be followed.*

**INCLUSION VISIT V 2**

V2: second visit: 1 hour

Date : □□/□□/□□□□ (**DD/MM/YYYY**)

- Reading aloud a meaningful text, La Mouette (Evaléo© 6-15)
- Phonological analysis, non-word repetition and rapid automatized naming (Evalec©)
- Visuo-attentional span (Evadys©)
- Oral comprehension (ECOSSE©) - only if oral language has not been tested or if there is still any doubt about a possible “specific language impairment”

|                      |                       |                                                     |
|----------------------|-----------------------|-----------------------------------------------------|
| <b>Internal code</b> | <b>Patient number</b> | <b>PHASE 1 - Selection and inclusion<br/>TEST 1</b> |
| 19-HPNCL-02          | □□/□□/□□□□            |                                                     |

|                                | Tests                                 |                                       | Data                  | Raw scores           | Rate +<br>or - | Z scores (SD or<br>percentiles) | Time<br>min |   |
|--------------------------------|---------------------------------------|---------------------------------------|-----------------------|----------------------|----------------|---------------------------------|-------------|---|
|                                | <b>P</b>                              | Reading<br>meaningful text<br>EVALEO© | "Mouette"             | Number of words read | □□□□           |                                 | □□          | 2 |
| Number of correct words        |                                       |                                       |                       | □□□□                 |                | □□                              |             |   |
| % correct/read                 |                                       |                                       |                       | □□□□.□□              |                | □□                              |             |   |
| Degradation index              |                                       |                                       |                       | □□□□                 |                | □□                              |             |   |
| <b>h</b>                       | Phonological<br>awareness<br>EVALEC©  | Syllabe<br>suppression                | Accuracy ( % errors ) | □□□□.□□□             |                | □□□.□□□                         | 8           |   |
|                                |                                       |                                       | Time in seconds       | □□□□.□□□             |                | □□□.□□□                         |             |   |
|                                |                                       | Phoneme<br>suppression CVC            | Accuracy ( % errors ) | □□□□.□□□             |                | □□□.□□□                         |             |   |
|                                |                                       |                                       | Time in seconds       | □□□□.□□□             |                | □□□.□□□                         |             |   |
|                                | Phoneme<br>suppression CCV            | Accuracy ( % errors )                 | □□□□.□□□              |                      | □□□.□□□        |                                 |             |   |
|                                |                                       | Time in seconds                       | □□□□.□□□              |                      | □□□.□□□        |                                 |             |   |
|                                | <b>1</b>                              | Non-word<br>repetition                | Span                  | □□                   |                | □□□.□□□                         |             | 5 |
|                                |                                       |                                       | Time in seconds       | □□□□.□□□             |                | □□□.□□□                         |             |   |
| Rapid<br>automatized<br>naming |                                       | Color recognition, %                  | □□□□.□□□              |                      | □□□.□□□        | 2                               |             |   |
|                                |                                       | Color recognition, time in seconds    | □□□□.□□□              |                      | □□□.□□□        |                                 |             |   |
|                                | Reading names, %                      | □□□□.□□□                              |                       | □□□.□□□              |                |                                 |             |   |
|                                | Reading names, time in seconds        | □□□□.□□□                              |                       | □□□.□□□              |                |                                 |             |   |
| <b>T</b>                       | Visuo-<br>attentional span<br>EVADYS© | Letter threshold                      | Threshold in ms       | □□□□                 |                | □□□.□□□                         | 20          |   |
|                                |                                       | Global Report<br>GR                   | GR Score              | □□□□                 |                | □□□.□□□                         |             |   |
|                                |                                       |                                       | GR Span               | □□.□□□               |                | □□□.□□□                         |             |   |
|                                |                                       | Partial Report PR                     | PR Score              | □□□                  |                | □□□.□□□                         |             |   |
|                                |                                       |                                       | PR Span               | □□.□□□               |                | □□□.□□□                         |             |   |
| <b>E</b>                       | Oral<br>comprehension                 | ECOSSE©                               | Number of errors      | □□□                  |                | □□□                             | 15          |   |
|                                |                                       |                                       | Total time (min)      |                      |                |                                 |             |   |

|                      |                       |                                                     |
|----------------------|-----------------------|-----------------------------------------------------|
| <b>Internal code</b> | <b>Patient number</b> | <b>PHASE 1 - Selection and inclusion<br/>TEST 1</b> |
| 19-HPNCL-02          | □□/□□/□□□□            |                                                     |

### **INCLUSION VISIT V 3**

---

V3: third visit: 1 hour

Date: □□□/□□□/□□□□□□ (DD/MM/YYYY)

- Local/global analysis (SIGL©)
- Reading aloud regular, irregular words, and non-words (Evalect©)
- Matrix Reasoning (Wisc V©) - only if the neuropsychological check-up has not been performed or if it is not planned
- Perception of the evolution of the disorder, 2 questionnaires for parents and children (Likert scale)

|                      |                       |                                                     |
|----------------------|-----------------------|-----------------------------------------------------|
| <b>Internal code</b> | <b>Patient number</b> | <b>PHASE 1 - Selection and inclusion<br/>TEST 1</b> |
| 19-HPNCL-02          | □□/□□/□□□□            |                                                     |

|                                                        | Tests                                       |                                        | Data                          | Raw Scores       | Rate + or -                                                                           | Z scores (SD or percentiles) | Time min       |
|--------------------------------------------------------|---------------------------------------------|----------------------------------------|-------------------------------|------------------|---------------------------------------------------------------------------------------|------------------------------|----------------|
|                                                        | <b>P<br/>h<br/>a<br/>s<br/>e<br/><br/>1</b> | Global/local analysis SIGL© "Drawings" | Response time (RT)            | Local RT (ms)    | _ _ _ _ .  _ _ _                                                                      |                              | _ _ _ .  _ _ _ |
| Global RT (ms)                                         |                                             |                                        |                               | _ _ _ _ .  _ _ _ |                                                                                       | _ _ _ .  _ _ _               |                |
| Interference asymmetry RT (ms)                         |                                             |                                        |                               | _ _ _ _ .  _ _ _ |                                                                                       | _ _ _ .  _ _ _               |                |
| Error Rate (ER)                                        |                                             |                                        | Local ER (%)                  | _ _ _ _ .  _ _ _ |                                                                                       | _ _ _ .  _ _ _               |                |
|                                                        |                                             |                                        | Global ER (%)                 | _ _ _ _ .  _ _ _ |                                                                                       | _ _ _ .  _ _ _               |                |
|                                                        |                                             |                                        | Interference asymmetry ER (%) | _ _ _ _ .  _ _ _ |                                                                                       | _ _ _ .  _ _ _               |                |
| <b>T<br/>E<br/>S<br/>T<br/><br/>1<br/><br/>V<br/>3</b> |                                             | Regular words (RW)                     | Accuracy ( % errors )         | _ _ _ _ .  _ _ _ |                                                                                       | _ _ _ .  _ _ _               | 15             |
|                                                        |                                             |                                        | Time in ms                    | _ _ _ _          |                                                                                       | _ _ _ .  _ _ _               |                |
|                                                        |                                             | Irregular words (IW)                   | Accuracy ( % errors )         | _ _ _ _ .  _ _ _ |                                                                                       | _ _ _ .  _ _ _               |                |
|                                                        |                                             |                                        | Time in ms                    | _ _ _ _          |                                                                                       | _ _ _ .  _ _ _               |                |
|                                                        |                                             | Non-words (NW)                         | Accuracy ( % errors )         | _ _ _ _ .  _ _ _ |                                                                                       | _ _ _ .  _ _ _               |                |
|                                                        |                                             |                                        | Time in ms                    | _ _ _ _          |                                                                                       | _ _ _ .  _ _ _               |                |
|                                                        | Short IW                                    | Accuracy ( % errors )                  | _ _ _ _ .  _ _ _              |                  | _ _ _ .  _ _ _                                                                        |                              |                |
|                                                        |                                             | Time in ms                             | _ _ _ _                       |                  | _ _ _ .  _ _ _                                                                        |                              |                |
|                                                        | Long IW                                     | Accuracy ( % errors )                  | _ _ _ _ .  _ _ _              |                  | _ _ _ .  _ _ _                                                                        |                              |                |
|                                                        |                                             | Time in ms                             | _ _ _ _                       |                  | _ _ _ .  _ _ _                                                                        |                              |                |
|                                                        | Short NW                                    | Accuracy ( % errors )                  | _ _ _ _ .  _ _ _              |                  | _ _ _ .  _ _ _                                                                        |                              |                |
|                                                        |                                             | Time in ms                             | _ _ _ _                       |                  | _ _ _ .  _ _ _                                                                        |                              |                |
| Long NW                                                | Accuracy ( % errors )                       | _ _ _ _ .  _ _ _                       |                               | _ _ _ .  _ _ _   |                                                                                       |                              |                |
|                                                        | Time in ms                                  | _ _ _ _                                |                               | _ _ _ .  _ _ _   |                                                                                       |                              |                |
| Wisc 5©                                                | Matrix Reasoning                            | Correct items /32                      | _ _                           |                  | _ _                                                                                   | 10                           |                |
| Surveys-Likert scale                                   | Child pre-test                              | Total points                           | _ _                           |                  | 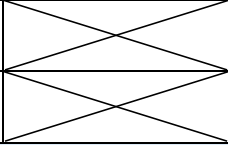 | 5                            |                |
|                                                        | Parents pre-test                            | Total points                           | _ _                           |                  |                                                                                       |                              |                |
| <b>Total time (min)</b>                                |                                             |                                        |                               |                  |                                                                                       |                              | <b>55</b>      |

|                      |                       |                                                     |
|----------------------|-----------------------|-----------------------------------------------------|
| <b>Internal code</b> | <b>Patient number</b> | <b>PHASE 1 - Selection and inclusion<br/>TEST 1</b> |
| 19-HPNCL-02          | □□/□□/□□□□            |                                                     |

#### **V4 INCLUSION VISIT**

---

V4: fourth visit: 1 hour

*Date* : □□□/□□□/□□□□□□ (*DD/MM/YYYY*)

- Short-term verbal memory and working memory, digit span (Evaléo©)
- Vocabulary (Evaléo©) - only if oral language has not been tested
- Visuo-spatial span (Corsi©)
- Reading comprehension (Orlec© L3)
- 2 minutes reading words, Eval2M (Evaléo©)
- Reading aloud a meaningless text (Deltatext© 1)

|                      |                       |                                                     |
|----------------------|-----------------------|-----------------------------------------------------|
| <b>Internal code</b> | <b>Patient number</b> | <b>PHASE 1 - Selection and inclusion<br/>TEST 1</b> |
| 19-HPNCL-02          | □□/□□/□□□□            |                                                     |

| P<br>H<br>A<br>S<br>E<br><br>1 | Tests                 |                          | Data                     | Raw Scores | Rate +<br>or -             | Z scores (SD or<br>percentiles) | Time<br>min |
|--------------------------------|-----------------------|--------------------------|--------------------------|------------|----------------------------|---------------------------------|-------------|
|                                | Digit span            | EVALEO©                  | Score forward span       | _          |                            | _                               | 8           |
|                                |                       |                          | Forward span             | _          |                            | _                               |             |
|                                |                       |                          | Score backward span      | _          |                            | _                               |             |
|                                |                       |                          | Backward span            | _          |                            | _                               |             |
|                                | Vocabulary<br>EVALEO© | Picture Naming           | Accuracy (correct iERms) | _          |                            | _                               | 15          |
|                                |                       |                          | Total time, in seconds   | _       .  |                            | _                               |             |
|                                |                       | Picture Designation      | Accuracy (correct iERms) | _          |                            | _                               |             |
|                                | Visuo-spatial<br>span | Corsi©                   | Forward span             | _          |                            | _     .  _                      | 8           |
|                                |                       |                          | Backward span            | _          |                            | _     .  _                      |             |
| WritERn<br>comprehension       | Orlec, L3©            | Accuracy (correct items) | _                        |            | _     .  _                 | 5                               |             |
|                                |                       | Correct items (%)        | _       .  _             |            | _     .  _                 |                                 |             |
| Reading<br>meaningless<br>text | Deltatext© 1          | Number of words read     | _                        |            | <del> _     .  _    </del> | 3                               |             |
|                                |                       | Number of errors         | _                        |            | <del> _     .  _    </del> |                                 |             |
|                                |                       | Time in seconds          | _                        |            | <del> _     .  _    </del> |                                 |             |
| Words readi in<br>2 min        | Eval 2M©              | Number of words read     | _                        |            | _                          | 2                               |             |
|                                |                       | Number of correct words  | _                        |            | _                          |                                 |             |
|                                |                       | % correct/read           | _       .  _             |            | _                          |                                 |             |
| Total time (min)               |                       |                          |                          |            |                            |                                 | 40          |

|                      |                       |                                                     |
|----------------------|-----------------------|-----------------------------------------------------|
| <b>Internal code</b> | <b>Patient number</b> | <b>PHASE 1 - Selection and inclusion<br/>TEST 1</b> |
| 19-HPNCL-02          | □□/□□/□□□□            |                                                     |

**INCLUSION AND NON-INCLUSION CRITERIA**

| <b>INCLUSION CRITERIA</b>                                                                                                                                                                                  | <b>Yes</b>               | <b>No</b>                |
|------------------------------------------------------------------------------------------------------------------------------------------------------------------------------------------------------------|--------------------------|--------------------------|
| Age greater than or equal to 8 years and less than or equal to 13 years.                                                                                                                                   | <input type="checkbox"/> | <input type="checkbox"/> |
| Diagnosis of dyslexia validated by performance lower than 1.5 standard deviation from the average developmental age on the Alouette© test and the reading tasks of irregular words and non-words (Evalec©) | <input type="checkbox"/> | <input type="checkbox"/> |
| Performance lower or equal to -1.5 standard deviation from the average in at least one phonological task (Evalec©) and at least one visuo-attentional task (Sigl©, Evadys©)                                | <input type="checkbox"/> | <input type="checkbox"/> |
| Home equipped with a computer connected to internet for daily training                                                                                                                                     | <input type="checkbox"/> | <input type="checkbox"/> |
| Informed consent signed by one of the parents or the representative of the parental authority                                                                                                              | <input type="checkbox"/> | <input type="checkbox"/> |
| Social Security affiliate or beneficiary                                                                                                                                                                   | <input type="checkbox"/> | <input type="checkbox"/> |

*If one or more "NO" boxes are checked the patient is not included in the study*

| <b>NON-INCLUSION CRITERIA</b>                                                 | <b>Yes</b>               | <b>No</b>                |
|-------------------------------------------------------------------------------|--------------------------|--------------------------|
| Intellectual delay or neurological disorders or global developmental disorder | <input type="checkbox"/> | <input type="checkbox"/> |
| Primary sensory deficit                                                       | <input type="checkbox"/> | <input type="checkbox"/> |
| Educational deficiencies                                                      | <input type="checkbox"/> | <input type="checkbox"/> |
| Attention Deficit Disorder with or without Hyperactivity (ADHD)               | <input type="checkbox"/> | <input type="checkbox"/> |
| Specific oral language impairment                                             | <input type="checkbox"/> | <input type="checkbox"/> |
| Previous daily phonological or visuo-attentional training                     | <input type="checkbox"/> | <input type="checkbox"/> |

*If one or more "YES" boxes are checked the patient is not included in the study*

Is the patient included in the study? Yes  No

If not, why: .....

Comments: .....



|                      |                       |                                                     |
|----------------------|-----------------------|-----------------------------------------------------|
| <b>Internal code</b> | <b>Patient number</b> | <b>PHASE 1 - Selection and inclusion<br/>TEST 1</b> |
| 19-HPNCL-02          | □□□/□□□/□□□□□         |                                                     |

## **RANDOMIZATION**

At the end of the inclusion visits, send your randomization sheet to: [karine.eskinazi@wanadoo.fr](mailto:karine.eskinazi@wanadoo.fr)

The coordinating investigator will tell you whether participants are assigned to group 1 or group 2 and will send you the appropriate CRFs following the study.

- Group 1: PHONO 1 - VA 2- IM 3
- Group 2: VA 1- PHONO 2- IM 3

The participant is not informed of his or her attribution to group 1 or 2 and will follow the instructions given by the associate investigative speech therapist regarding the conduct of the study.

*Rating:* Treatment group:    1     2

**Randomization No.:**

**Center No. :**

|                      |                       |                                                     |
|----------------------|-----------------------|-----------------------------------------------------|
| <b>Internal code</b> | <b>Patient number</b> | <b>PHASE 1 - Selection and inclusion<br/>TEST 1</b> |
| 19-HPNCL-02          | □□/□□/□□□□            |                                                     |

|       |                                | Treatments     |                          |                          | DIAGNOSIS | Start<br>(DD/MM/YYYY) | End           |                          |
|-------|--------------------------------|----------------|--------------------------|--------------------------|-----------|-----------------------|---------------|--------------------------|
| TYPES | CHECK-UP DATES<br>(DD/MM/YYYY) | Rehabilitation |                          | End Date<br>(JJ/MM/AAAA) |           |                       | Ongoing       |                          |
|       |                                | Yes            | No                       |                          |           |                       |               |                          |
| 1     | .....                          | □□□/□□□/□□□□□  | <input type="checkbox"/> | <input type="checkbox"/> | .....     | □□□/□□□/□□□□□         | □□□/□□□/□□□□□ | <input type="checkbox"/> |
| 2     | .....                          | □□□/□□□/□□□□□  | <input type="checkbox"/> | <input type="checkbox"/> | .....     | □□□/□□□/□□□□□         | □□□/□□□/□□□□□ | <input type="checkbox"/> |
| 3     | .....                          | □□□/□□□/□□□□□  | <input type="checkbox"/> | <input type="checkbox"/> | .....     | □□□/□□□/□□□□□         | □□□/□□□/□□□□□ | <input type="checkbox"/> |
| 4     | .....                          | □□□/□□□/□□□□□  | <input type="checkbox"/> | <input type="checkbox"/> | .....     | □□□/□□□/□□□□□         | □□□/□□□/□□□□□ | <input type="checkbox"/> |
| 5     | .....                          | □□□/□□□/□□□□□  | <input type="checkbox"/> | <input type="checkbox"/> | .....     | □□□/□□□/□□□□□         | □□□/□□□/□□□□□ | <input type="checkbox"/> |
| 6     | .....                          | □□□/□□□/□□□□□  | <input type="checkbox"/> | <input type="checkbox"/> | .....     | □□□/□□□/□□□□□         | □□□/□□□/□□□□□ | <input type="checkbox"/> |

*Thank you for postponing all treatment received except treatment provided in the study*
