# Supplementary material for: Multimodal intervention in 8- to 13-year-old French dyslexic readers: Study protocol for a randomized multicenter controlled crossover trial
Source: PubMed Central journal article supplement (PMC9795620; doi:10.1186/s12887-022-03701-8), 2022-12-28
Supplement: 12887_2022_3701_MOESM8_ESM.pdf [file 12887_2022_3701_MOESM8_ESM.pdf]

## Assessment of reading disability impact

| PRE-TEST LIKERT SCALE - CHILD                                   |                 |               |              |            |                |       |
|-----------------------------------------------------------------|-----------------|---------------|--------------|------------|----------------|-------|
|                                                                 | 1<br>Not at all | 2<br>A little | 3<br>Average | 4<br>A lot | 5<br>Very much | Total |
| I like to read                                                  |                 |               |              |            |                |       |
| Reading is easy                                                 |                 |               |              |            |                |       |
| I read quickly                                                  |                 |               |              |            |                |       |
| I've already read several books from beginning to end           |                 |               |              |            |                |       |
| Outside of school and homework, I read other books or magazines |                 |               |              |            |                |       |
| Outside of school and homework, I read comics                   |                 |               |              |            |                |       |
| I understand what I'm reading                                   |                 |               |              |            |                |       |
| I like to get a book as a present                               |                 |               |              |            |                |       |
| I have good grades in French (or English)                       |                 |               |              |            |                |       |
| I have good grades in History/Geography                         |                 |               |              |            |                |       |
| I have good grades in Mathematics                               |                 |               |              |            |                |       |
| I think I can do well in school                                 |                 |               |              |            |                |       |
| I like to go to school                                          |                 |               |              |            |                |       |
| Total score                                                     |                 |               |              |            |                |       |

**PRE-TEST LIKERT SCALE - PARENTS**

|                                                           | <b>1</b><br>Not at all | <b>2</b><br>A bit | <b>3</b><br>Normal | <b>4</b><br>A lot | <b>5</b><br>So much | <b>Total</b> |
|-----------------------------------------------------------|------------------------|-------------------|--------------------|-------------------|---------------------|--------------|
| Your child likes to read.                                 |                        |                   |                    |                   |                     |              |
| Reading is an easy activity for him/her.                  |                        |                   |                    |                   |                     |              |
| He/she reads quickly.                                     |                        |                   |                    |                   |                     |              |
| He/she has already read several books entirely.           |                        |                   |                    |                   |                     |              |
| Outside of school, he/she reads other books or magazines. |                        |                   |                    |                   |                     |              |
| Outside of school, he/she reads comics.                   |                        |                   |                    |                   |                     |              |
| Does your child understand what is he/she reading ?       |                        |                   |                    |                   |                     |              |
| Does he/she appreciate a book as a gift ?                 |                        |                   |                    |                   |                     |              |
| Does he/she have good grades in French (or English)       |                        |                   |                    |                   |                     |              |
| Does he/she have good grades in History/Geography ?       |                        |                   |                    |                   |                     |              |
| Does he/she have good grades in Mathematics ?             |                        |                   |                    |                   |                     |              |
| Does he/she think he or she can do well in school ?       |                        |                   |                    |                   |                     |              |
| Does he/she enjoy going to school ?                       |                        |                   |                    |                   |                     |              |
| <b>Total score</b>                                        |                        |                   |                    |                   |                     |              |

**POST-TEST LIKERT SCALE - CHILD**

|                                                                 | <b>1</b><br>Not at all | <b>2</b><br>A little | <b>3</b><br>Average | <b>4</b><br>A lot | <b>5</b><br>Very much | <b>Total</b> |
|-----------------------------------------------------------------|------------------------|----------------------|---------------------|-------------------|-----------------------|--------------|
| I like to read                                                  |                        |                      |                     |                   |                       |              |
| Reading is easy                                                 |                        |                      |                     |                   |                       |              |
| I read quickly                                                  |                        |                      |                     |                   |                       |              |
| I've already read several books from beginning to end           |                        |                      |                     |                   |                       |              |
| Outside of school and homework, I read other books or magazines |                        |                      |                     |                   |                       |              |
| Outside of school and homework, I read comics                   |                        |                      |                     |                   |                       |              |
| I understand what I'm reading                                   |                        |                      |                     |                   |                       |              |
| I like to get a book as a present                               |                        |                      |                     |                   |                       |              |
| I have good grades in French (or English)                       |                        |                      |                     |                   |                       |              |
| I have good grades in History/Geography                         |                        |                      |                     |                   |                       |              |
| I have good grades in Mathematics                               |                        |                      |                     |                   |                       |              |
| I think I can do well in school                                 |                        |                      |                     |                   |                       |              |
| I like to go to school                                          |                        |                      |                     |                   |                       |              |
| Total score                                                     |                        |                      |                     |                   |                       |              |

**POST-TEST LIKERT SCALE - PARENTS**

|                                                           | <b>1</b><br>Not at all | <b>2</b><br>A bit | <b>3</b><br>Normal | <b>4</b><br>A lot | <b>5</b><br>So much | <b>Total</b> |
|-----------------------------------------------------------|------------------------|-------------------|--------------------|-------------------|---------------------|--------------|
| Your child likes to read.                                 |                        |                   |                    |                   |                     |              |
| Reading is an easy activity for him/her.                  |                        |                   |                    |                   |                     |              |
| He/she reads quickly.                                     |                        |                   |                    |                   |                     |              |
| He/she has already read several books entirely.           |                        |                   |                    |                   |                     |              |
| Outside of school, he/she reads other books or magazines. |                        |                   |                    |                   |                     |              |
| Outside of school, he/she reads comics.                   |                        |                   |                    |                   |                     |              |
| Does your child understand what is he/she reading ?       |                        |                   |                    |                   |                     |              |
| Does he/she appreciate a book as a gift ?                 |                        |                   |                    |                   |                     |              |
| Does he/she have good grades in French (or English)       |                        |                   |                    |                   |                     |              |
| Does he/she have good grades in History/Geography ?       |                        |                   |                    |                   |                     |              |
| Does he/she have good grades in Mathematics ?             |                        |                   |                    |                   |                     |              |
| Does he/she think he or she can do well in school ?       |                        |                   |                    |                   |                     |              |
| Does he/she enjoy going to school ?                       |                        |                   |                    |                   |                     |              |
| <b>Total score</b>                                        |                        |                   |                    |                   |                     |              |
